# Supplementary material for: Spatial constraints on the diffusion of religious innovations: The case of early Christianity in the Roman Empire
Source: PLoS One. 2018 Dec 26;13(12):e0208744. doi: 10.1371/journal.pone.0208744 (PMC6306252; doi:10.1371/journal.pone.0208744)
Supplement: S5 File — For every ORBIS city, only a year of the earliest congregation is retained in the year column. (CSV) [file pone.0208744.s010.csv]

# Early christian congregations mapped to nearest ORBIS city.
# nearest_orbis: id of the ORBIS site
# christ: year before which the congregation emerged
nearest_orbis	christ
50002	200.0
50005	304.0
50006	200.0
50008	304.0
50011	304.0
50012	200.0
50014	100.0
50015	304.0
50016	304.0
50017	100.0
50019	100.0
50021	304.0
50022	304.0
50023	304.0
50024	100.0
50025	100.0
50026	200.0
50027	200.0
50028	304.0
50031	304.0
50034	304.0
50037	304.0
50039	304.0
50042	304.0
50043	304.0
50046	304.0
50048	304.0
50050	100.0
50054	304.0
50056	304.0
50057	304.0
50059	304.0
50060	304.0
50061	304.0
50063	304.0
50065	304.0
50069	304.0
50070	200.0
50072	304.0
50073	304.0
50074	304.0
50076	304.0
50078	304.0
50079	304.0
50080	200.0
50086	304.0
50087	304.0
50088	304.0
50092	304.0
50093	304.0
50094	100.0
50095	200.0
50096	304.0
50097	304.0
50103	304.0
50104	304.0
50106	304.0
50107	200.0
50108	304.0
50111	304.0
50113	304.0
50115	304.0
50117	304.0
50120	200.0
50122	304.0
50123	304.0
50124	200.0
50126	304.0
50127	304.0
50131	304.0
50134	304.0
50135	304.0
50136	304.0
50138	100.0
50139	304.0
50140	100.0
50146	200.0
50153	304.0
50155	200.0
50157	304.0
50158	304.0
50160	304.0
50161	100.0
50163	304.0
50164	304.0
50165	304.0
50167	304.0
50169	100.0
50170	304.0
50171	304.0
50172	304.0
50173	304.0
50174	304.0
50175	304.0
50176	304.0
50179	304.0
50181	304.0
50183	304.0
50184	304.0
50187	304.0
50188	304.0
50192	304.0
50193	304.0
50194	304.0
50198	304.0
50199	304.0
50202	100.0
50204	304.0
50206	304.0
50208	304.0
50213	100.0
50215	304.0
50216	100.0
50221	304.0
50222	200.0
50223	304.0
50225	200.0
50227	200.0
50228	304.0
50229	304.0
50230	200.0
50231	304.0
50232	304.0
50235	304.0
50237	304.0
50242	304.0
50243	100.0
50244	304.0
50245	100.0
50247	304.0
50248	304.0
50251	304.0
50253	200.0
50254	304.0
50256	304.0
50260	304.0
50264	304.0
50265	304.0
50267	200.0
50268	200.0
50271	304.0
50272	200.0
50273	100.0
50274	304.0
50275	100.0
50278	304.0
50281	304.0
50285	304.0
50286	200.0
50288	304.0
50290	304.0
50291	304.0
50294	304.0
50296	100.0
50299	304.0
50300	100.0
50301	304.0
50302	304.0
50304	304.0
50305	100.0
50306	304.0
50307	304.0
50309	304.0
50310	304.0
50312	304.0
50317	304.0
50320	304.0
50322	100.0
50323	304.0
50327	100.0
50329	304.0
50331	304.0
50332	304.0
50335	304.0
50336	200.0
50338	200.0
50340	100.0
50342	304.0
50343	304.0
50344	304.0
50346	100.0
50347	304.0
50350	304.0
50352	304.0
50353	304.0
50356	304.0
50358	304.0
50359	304.0
50361	304.0
50362	200.0
50363	100.0
50364	304.0
50366	304.0
50367	304.0
50369	304.0
50374	304.0
50376	304.0
50378	304.0
50380	100.0
50381	304.0
50382	304.0
50384	200.0
50385	304.0
50387	304.0
50388	304.0
50389	100.0
50390	304.0
50393	304.0
50396	304.0
50398	304.0
50399	304.0
50400	100.0
50401	304.0
50403	304.0
50404	304.0
50405	100.0
50406	304.0
50410	304.0
50414	304.0
50415	304.0
50416	304.0
50418	200.0
50425	304.0
50427	304.0
50428	304.0
50429	200.0
50430	304.0
50431	100.0
50432	304.0
50433	304.0
50435	304.0
50436	304.0
50437	100.0
50438	304.0
50439	200.0
50440	304.0
50441	304.0
50442	304.0
50443	304.0
50444	304.0
50446	100.0
50447	100.0
50452	100.0
50453	100.0
50454	200.0
50455	200.0
50458	100.0
50459	304.0
50461	304.0
50472	304.0
50477	304.0
50478	304.0
50479	200.0
50481	200.0
50482	304.0
50484	304.0
50486	304.0
50490	304.0
50491	304.0
50492	304.0
50495	304.0
50498	200.0
50503	200.0
50516	304.0
50522	304.0
50537	304.0
50538	304.0
50544	200.0
50548	200.0
50549	100.0
50552	304.0
50553	304.0
50555	304.0
50569	304.0
50577	200.0
50582	304.0
50588	304.0
50592	304.0
50594	304.0
50599	304.0
50604	304.0
50611	200.0
50612	304.0
50613	304.0
50615	200.0
50616	304.0
50619	200.0
50624	304.0
50626	304.0
50627	304.0
50628	304.0
50629	304.0
50631	100.0
50632	200.0
50636	100.0
50639	100.0
50643	304.0
50644	200.0
50646	304.0
50647	304.0
50651	304.0
50654	304.0
50657	100.0
50658	100.0
50659	304.0
50661	304.0
50663	304.0
50668	304.0
50670	304.0
50675	304.0
50680	304.0
50685	304.0
50712	304.0
50713	304.0
50715	304.0
50717	304.0
50718	304.0
50719	100.0
50720	200.0
50741	200.0
50744	304.0
50790	100.0
50791	100.0
51171	304.0
